# Supplementary material
Source: PubMed Central journal article supplement (PMC5520074)

**Suppl. Fig. 1**

**A**

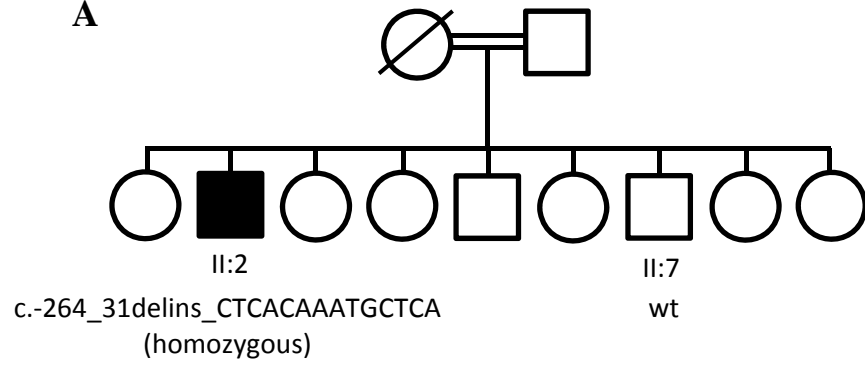

**B**

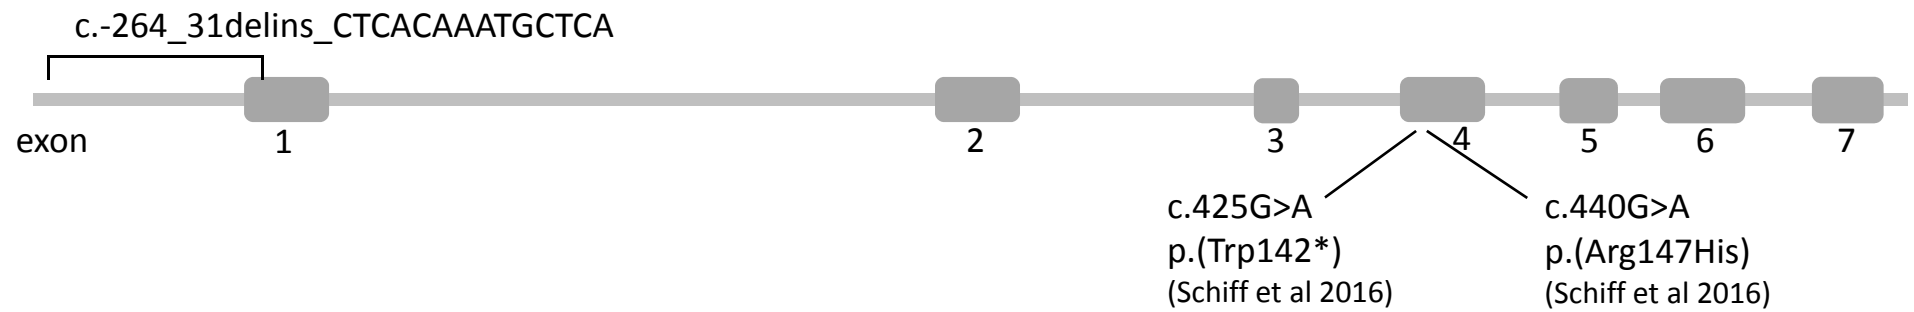

Supplement: ejhg201762x1.pdf [file ejhg201762x1.pdf]

Suppl Fig 2

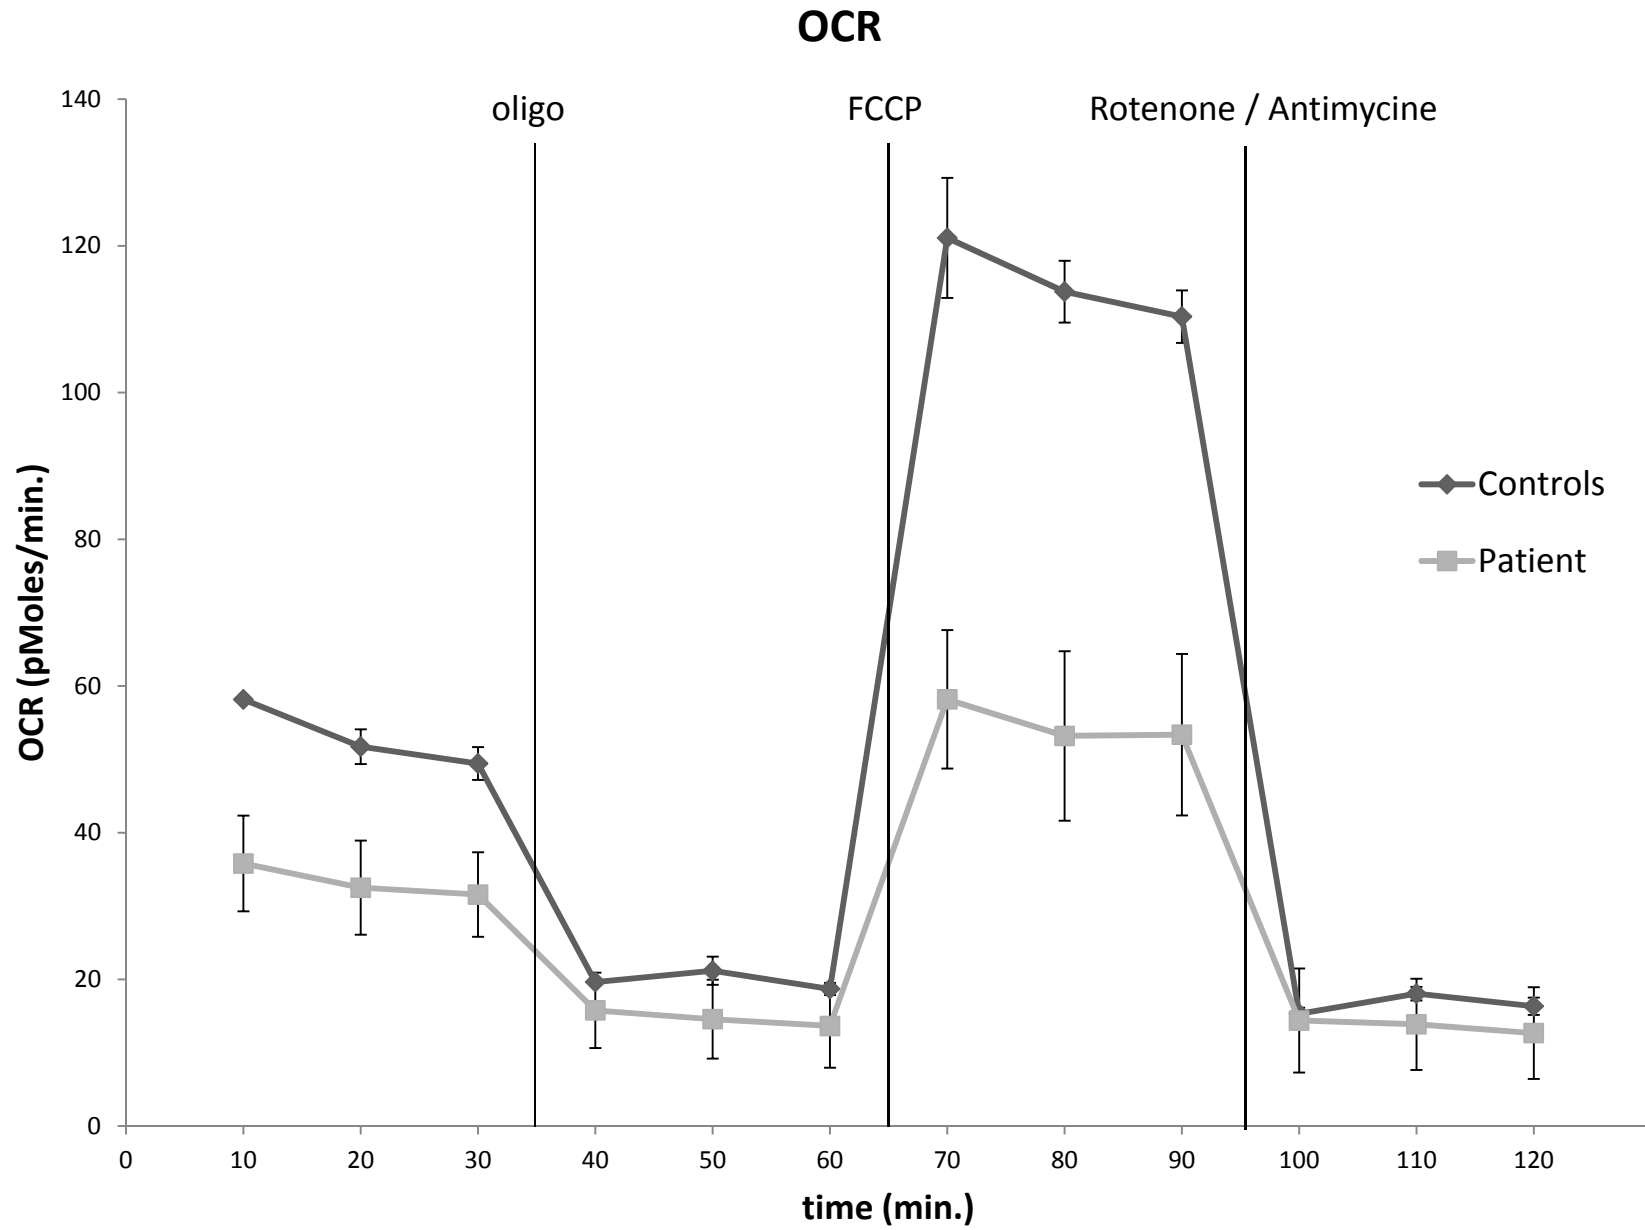

Supplement: ejhg201762x2.pdf [file ejhg201762x2.pdf]
